# Supplementary material for: A targetable fluorescent sensor for hypochlorite based on a luminescent europium complex loaded carbon nanotube
Source: Royal Society of Chemistry journal article supplement (doi:10.1039/c2an16247d), 2012-01-01
Supplement: c2an16247d.pdf [file c2an16247d.pdf]

## Supporting information for

### A Targetable Fluorescent Sensor for Hypochlorite Based on Luminescent Europium Complex Loaded Carbon Nanotube

Qianming Wang\*, Chaoliang Tan, Weisheng Cai

*School of Chemistry and Environment, South China Normal University, Guangzhou 510006,*

*P. R. China*

\* To whom the correspondence should be addressed. E-mail: [qmwang@scnu.edu.cn](mailto:qmwang@scnu.edu.cn)

Tel: 86-20-39310258; Fax: 86-20-39310187

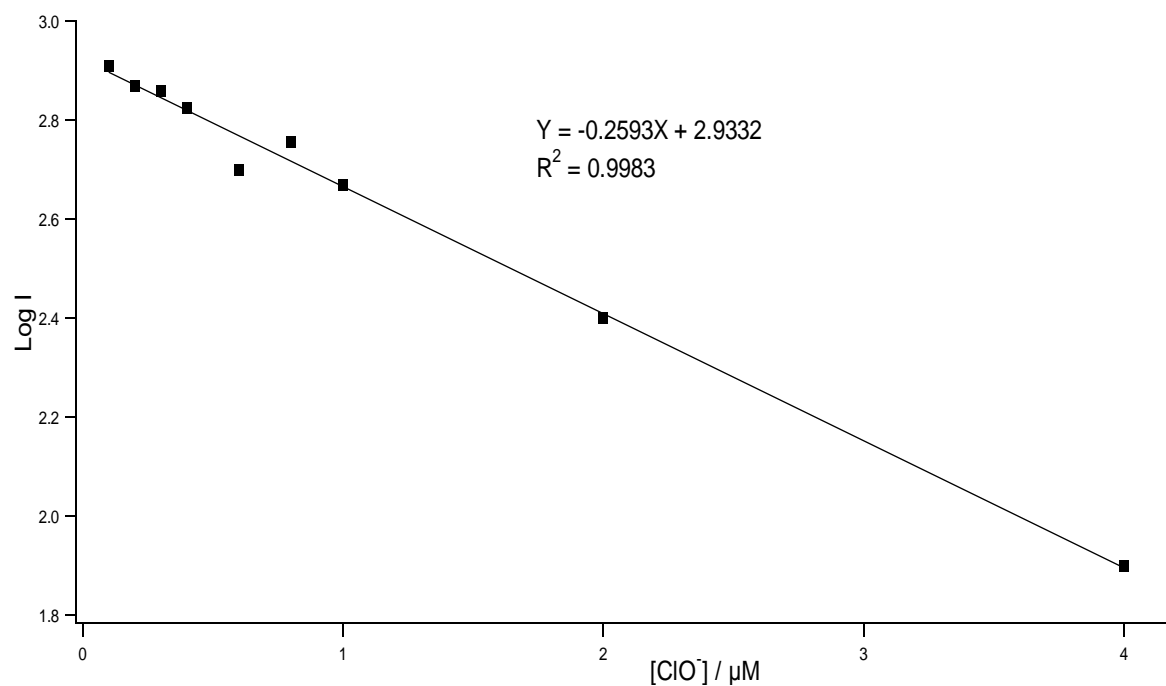

Figure S1 Logarithm of emission intensity of SWNT-4 at 612 nm with the concentration versus NaClO concentration range from 0.1 to 4 μM in drinking water.

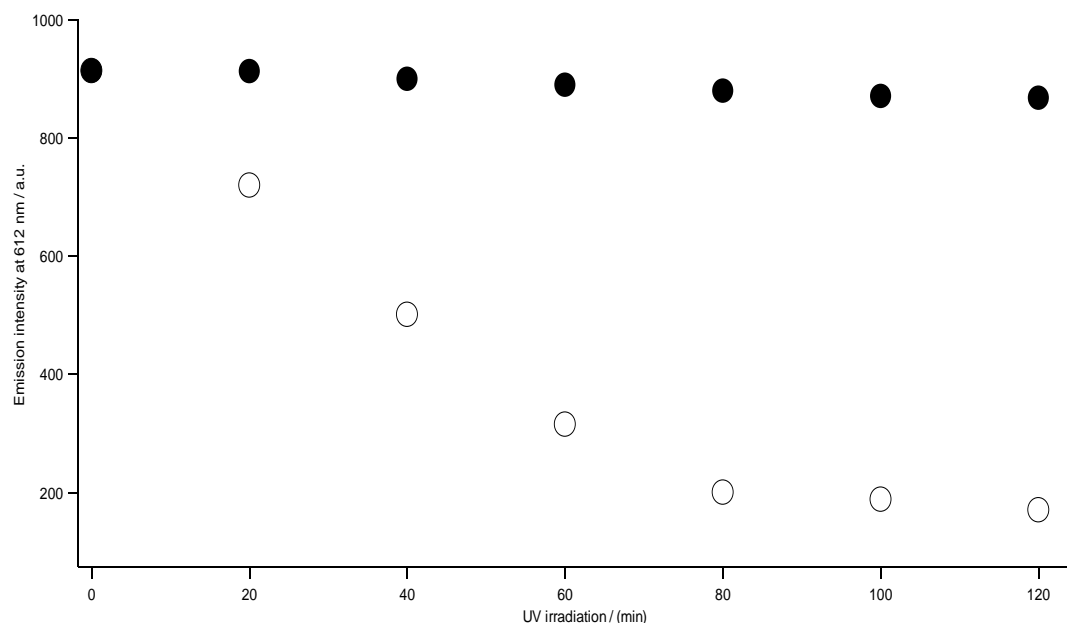

Figure S2 Emission intensity at 613 nm under UV-irradiation at 340 nm (xenon lamp 450 W).  
(full circle: SWNT-4; empty circle: Eu(III) binary complex with dipicolinic acid).
